# Supplementary material
Source: Research Square preprint supplement (doi:10.21203/rs.3.rs-9459508/v1)
Supplement: Supplementary file 1 [file 52964c473fa5977ce5efce96.docx]

**Title: Semi‑rational design** **and modification of *Cci*UPO for the efficient biosynthesis of 25-hydroxyvitamin D3**

**Jingyi Zhou1, Yingjia Tong1, Fan He1, Kai Chu1, Hang Zhong1, Jinsong Shi1, Zhenghong Xu2,** **Hui Li1 #**

1 School of Life Sciences and Health Engineering, Jiangnan University, Wuxi 214122, China

2 College of Biomass Science and Engineering, Sichuan University, Chengdu 610021, China

# Corresponding author:

E-mail addresses: lihui@jiangnan.edu.cn (Hui Li)

**Table S1** Main primers used in this study

| **Primers** | **5’-3’** |
| --- | --- |

| M69A-F | AGGGTTTTAACGCTGAGTATGGTATTGCCACATTCGTAACTTACGCTG |
| --- | --- |
| M69A-R | GGCAATACCATACTCAGCGTTAAAACCCTCCTGGACAGCCGTTAT |
| I73A-F | ATGGAGTATGGTGCTGCCACATTCGTAACTTACGCTGCTCACTTAGT |
| I73A-R | ACGAATGTGGCAGCACCATACTCCATGTTAAAACCCTCCTGGACAGC |
| F76A-F | GGTATTGCCACAGCTGTAACTTACGCTGCTCACTTAGTAGACGG |
| F76A-R | TAAGTTACAGCTGTGGCAATACCATACTCCATGTTAAAACCCTCCTGG |
| V77A-F | TTGCCACATTCGCTACTTACGCTGCTCACTTAGTAGACGGCAACC |
| V77A-R | GCGTAAGTAGCGAATGTGGCAATACCATACTCCATGTTAAAACCCTCC |
| F121A-F | ACACGCATGCCGTAGCCGAAGGAGACGCATCAATGACGCGTGG |
| F121A-R | GATGCGTCTCCTTCGGCTACGGCATGCGTGTTCAGACCACCGACA |
| E122A-F | GCATGCCGTATTCGCCGGAGACGCATCAATGACGCGTGGAGATTTCC |
| E122A-R | TTGATGCGTCTCCGGCGAATACGGCATGCGTGTTCAGACCACCGAC |
| P188A-F | TGACTTTACAAGTGCAAGGTACTTTACGGCATACGCCGAATCTGT |
| P188A-R | GTAAAGTACCTTGCACTTGTAAAGTCAAACTGACCGTTCGTAGCC |
| R189A-F | ACTTTACAAGTCCCGCCTACTTTACGGCATACGCCGAATCTGTGTT |
| R189A-R | CCGTAAAGTAGGCGGGACTTGTAAAGTCAAACTGACCGTTCGTAGCC |
| F191A-F | ACAAGTCCCAGGTACGCCACGGCATACGCCGAATCTGTGTTCCCT |
| F191A-R | TATGCCGTGGCGTACCTGGGACTTGTAAAGTCAAACTGACCGTTCG |
| T192A-F | CAGGTACTTTGCCGCATACGCCGAATCTGTGTTCCCTATTAACTTCTT |
| T192A-R | GGCGTATGCGGCAAAGTACCTGGGACTTGTAAAGTCAAACTGACCG |
| Y194A-F | TTTACGGCAGCCGCCGAATCTGTGTTCCCTATTAACTTCTTCACGGA |
| Y194A-R | GATTCGGCGGCTGCCGTAAAGTACCTGGGACTTGTAAAGTCAAACT |
| E196A-F | GGCATACGCCGCATCTGTGTTCCCTATTAACTTCTTCACGGACGGT |
| E196A-R | AGGGAACACAGATGCGGCGTATGCCGTAAAGTACCTGGGACTTG |
| S197A-F | TACGCCGAAGCCGTGTTCCCTATTAACTTCTTCACGGACGGTAGATT |
| S197A-R | AGGGAACACGGCTTCGGCGTATGCCGTAAAGTACCTGGGACT |
| F199A-F | ATCTGTGGCCCCTATTAACTTCTTCACGGACGGTAGATTATTTACTTC |
| F199A-R | GAAGTTAATAGGGGCCACAGATTCGGCGTATGCCGTAAAGTAC |
| G245A-F | GTGCCTTCAGCCGCCCGTGGCTTAGATGTTGTAGCTGCTGCTTATCCA |
| G245A-R | TAAGCCACGGGCGGCTGAAGGCACAGGAGCCCTATGGAAGTCC |
| L249A-F | GGTGCCCGTGGCGCCGATGTTGTAGCTGCTGCTTATCCAATTCAGC |
| L249A-R | GCTACAACATCGGCGCCACGGGCACCTGAAGGCACAGGAGC |
| D250A-F | CCCGTGGCTTAGCCGTTGTAGCTGCTGCTTATCCAATTCAGCCT |
| D250A-R | AGCAGCAGCTACAACGGCTAAGCCACGGGCACCTGAAGGCACAG |
| V251A-F | GTGGCTTAGATGCCGTAGCTGCTGCTTATCCAATTCAGCCTGGA |
| V251A-R | GCAGCAGCTACGGCATCTAAGCCACGGGCACCTGAAGGCACA |
| F280A-F | GTGCTGATGCCACAAAATTCTGCCTTCTATATGAAAACTTTGTGCTA |
| F280A-R | AATTTTGTGGCATCAGCACTCGTGGGATCTAAAACATAGTTATTGACC |
| F283A-F | ATTTCACAAAAGCCTGCCTTCTATATGAAAACTTTGTGCTAAAAACTGTGA |
| F283A-R | CATATAGAAGGCAGGCTTTTGTGAAATCAGCACTCGTGGGATCTAAA |

**Table S1** Main primers used in this study (Continued)

| **Primers** | **5’-3’** |
| --- | --- |
| L286A-F | ATTCTGCCTTGCCTATGAAAACTTTGTGCTAAAAACTGTGAAGGGAC |
| L286A-R | TTTCATAGGCAAGGCAGAATTTTGTGAAATCAGCACTCGTGGG |
| P322A-F | TATCAATCCTTTGCCGGATCAGGAGGATGCCCACAGGTCTTTCC |
| P322A-R | TGATCCGGCAAAGGATTGATAAAAATACTCTAGATTCGTTTCTAAGG |
| A195P-F | TTTACGGCATACCCCGAATCTGTGTTCCCTATTAACTTCTTCACGGACG |
| A195P-R | CACAGATTCGGGGTATGCCGTAAAGTACCTGGGACTTGTAAAGTCAAAC |
| A195C-F | TTTACGGCATACTGCGAATCTGTGTTCCCTATTAACTTCTTCACGGACG |
| A195C-R | CACAGATTCGCAGTATGCCGTAAAGTACCTGGGACTTGTAAAGTCAAAC |
| V77M-F | TATTGCCACATTCATGACTTACGCTGCTCACTTAGTAGACGGCAACC |
| V77M-R | AGCGTAAGTCATGAATGTGGCAATACCATACTCCATGTTAAAACCCTCC |
| V77P-F | TATTGCCACATTCCCCACTTACGCTGCTCACTTAGTAGACGGCAACC |
| V77P-R | AGCGTAAGTGGGGAATGTGGCAATACCATACTCCATGTTAAAACCCTCC |
| V77L-F | TATTGCCACATTCCTGACTTACGCTGCTCACTTAGTAGACGGCAACC |
| V77L-R | AGCGTAAGTCAGGAATGTGGCAATACCATACTCCATGTTAAAACCCTCC |
| G72A-F | CATGGAGTATGCCATTGCCACATTCGTAACTTACGCTGCTCAC |
| G72A-R | AATGTGGCAATGGCATACTCCATGTTAAAACCCTCCTGGACAGCC |
| T75A-F | ATGGTATTGCCGCCTTCGTAACTTACGCTGCTCACTTAGTAGACGG |
| T75A-R | AAGTTACGAAGGCGGCAATACCATACTCCATGTTAAAACCCTCCTG |
| G97A-F | ATATCCATTGGTGCCAAGACTAGAAAAACTGGTCCTGATCCTCCAC |
| G97A-R | TTCTAGTCTTGGCACCAATGGATATTAAATTGGTCAGGGGGTTGCCG |
| K101A-F | GTGGTAAGACTAGAGCCACTGGTCCTGATCCTCCACCACCCGC |
| K101-R | GGACCAGTGGCTCTAGTCTTACCACCAATGGATATTAAATTGGTCAGGG |
| I111A-F | CACCCGCCGCCGTCGGTGGTCTGAACACGCATGCCGTATTC |
| I111A-R | CAGACCACCGACGGCGGCGGGTGGTGGAGGATCAGGACCAGT |
| G130A-F | ATGACGCGTGCCGATTTCCATTTGGGAGATAACTTCAATTTCAATCAGA |
| G130A-R | CAAATGGAAATCGGCACGCGTCATTGATGCGTCTCCTTCGAATACGG |
| F132A-F | GTGGAGATGCCCATTTGGGAGATAACTTCAATTTCAATCAGACTTTA |
| F132A-R | GTTATCTCCCAAATGGGCATCTCCACGCGTCATTGATGCGTCTCCTT |

| G245A-F | GTGCCTTCAGCCGCCCGTGGCTTAGATGTTGTAGCTGCTGCTTATCCA |
| --- | --- |
| G245A-R | TAAGCCACGGGCGGCTGAAGGCACAGGAGCCCTATGGAAGTCC |
| G245Y-F | CCTGTGCCTTCATACGCCCGTGGCTTAGATGTTGTAGCTGCTGCTT |
| G245Y-R | CTAAGCCACGGGCGTATGAAGGCACAGGAGCCCTATGGAAGTCC |
| I73M-F | ATGGAGTATGGTATGGCCACATTCGTAACTTACGCTGCTCACTTAGTAG |
| I73M-R | ACGAATGTGGCCATACCATACTCCATGTTAAAACCCTCCTGGACA |
| H133A-F | TGGAGATTTCGCCTTGGGAGATAACTTCAATTTCAATCAGACTTTATGGG |
| H133A-R | AGTTATCTCCCAAGGCGAAATCTCCACGCGTCATTGATGCGTCTC |
| H133G-F | TGGAGATTTCGGATTGGGAGATAACTTCAATTTCAATCAGACTTTATGGG |
| H133G-R | AGTTATCTCCCAATCCGAAATCTCCACGCGTCATTGATGCGTCTC |
| P108A-F | TGATCCTCCAGCCCCCGCCATTGTCGGTGGTCTGAACACGC |
| P108A-R | AATGGCGGGGGCTGGAGGATCAGGACCAGTTTTTCTAGTCTTACCACC |
| P108K-F | TCCTGATCCTCCAAAACCCGCCATTGTCGGTGGTCTGAACACG |
| P108K-R | ACAATGGCGGGTTTTGGAGGATCAGGACCAGTTTTTCTAGTCTTACCACC |

**Table S1** Main primers used in this study (Continued)

| **Primers** | **5’-3’** |
| --- | --- |
| YZ-F | ATGTTCCCTCCTCCTCCTCCA |
| YZ-R | GTCTGACTTTCCCCAGGGAAAGAC |

Note: The mutation site has been marked with an underline.
